# Supplementary material for: Alignment of Perceived Competencies and Perceived Job Tasks among Primary Care Managers
Source: PubMed Central journal article supplement (PMC7151202; doi:10.3390/healthcare8010009), 2019-12-27
Supplement: healthcare-08-00009-s001.pdf [file healthcare-08-00009-s001.pdf]

Medicinski fakultet Univerziteta u Beogradu  
Institut za socijalnu medicinu

**PROGRAM UNAPREĐENJA MENADŽMENTA  
ZDRAVSTVENIM USTANOVAMA U BEOGRADU**

**UPITNIK ZA UČESNIKE PROGRAMA**

I

|                                                                                |                      |             |
|--------------------------------------------------------------------------------|----------------------|-------------|
| Godine života:                                                                 | Pol: m    ž          |             |
| 1. Ustanova:                                                                   | Godine radnog staža: |             |
| 2. Vaše radno mesto (molimo, navedite i rukovodeću funkciju):                  |                      |             |
| 3. Koliko ste dugo na tom radnom mestu:                                        |                      |             |
| 4. Molimo, navedite stepene obrazovanja koje ste stekli:                       |                      |             |
| 5. Molimo, navedite eventualnu obuku iz menadžmeta koju ste prethodno pohađali |                      |             |
| <u>Tema</u>                                                                    | <u>broj dana</u>     | <u>kada</u> |

**II Molimo da za svaki od 6 tipova zadatka radnog mesta u koloni A, zakružite odgovore na pitanja u kolonama B i C.**

**KOLONA A**

**KOLONA B**

**KOLONA C**

| Zadaci Vašeg radnog mesta                                                                                  | Važnost zadatka za uspešan rad |             |               |             |            | Stepen veštine koji posedujete za obavljanje zadatka |       |         |      |       |
|------------------------------------------------------------------------------------------------------------|--------------------------------|-------------|---------------|-------------|------------|------------------------------------------------------|-------|---------|------|-------|
|                                                                                                            | Nije Važan                     | Retko važan | Ponekad važan | Često Važan | Vrlo Važan | Nemam Veštinu                                        | Nizak | Srednji | Viši | Visok |
|                                                                                                            | 1                              | 2           | 3             | 4           | 5          | 1                                                    | 2     | 3       | 4    | 5     |
| <b>1. KOMUNIKACIJE</b> <span style="float: right;">.....→</span>                                           |                                |             |               |             |            |                                                      |       |         |      |       |
| Usmena prezentacija pred 8 ili više osoba                                                                  |                                |             |               |             |            |                                                      |       |         |      |       |
| Bilni intervjuisan ili pisati članak za medije (TV, radio, novine)                                         |                                |             |               |             |            |                                                      |       |         |      |       |
| Planirati i primeniti program komunikacije u organizaciji ili sa njenim korisnicima.                       |                                |             |               |             |            |                                                      |       |         |      |       |
| Dizajnirati dugoročnu komunikacionu strategiju programa ili organizacione jedinice                         |                                |             |               |             |            |                                                      |       |         |      |       |
| <b>2. GRAĐENJE TIMA</b>                                                                                    |                                |             |               |             |            |                                                      |       |         |      |       |
| Biti član tima i radom doprinostiti timu                                                                   |                                |             |               |             |            |                                                      |       |         |      |       |
| Voditi tim odgovoran za ključne organizacione aktivnosti                                                   |                                |             |               |             |            |                                                      |       |         |      |       |
| Graditi timove i rukovoditi timovima zaduženim da proizvedu ključne organizacione rezultate                |                                |             |               |             |            |                                                      |       |         |      |       |
| <b>3. PLANIRANJE I USPOSTAVLJANJE PRIORITETA</b>                                                           |                                |             |               |             |            |                                                      |       |         |      |       |
| Postaviti prioritete u individualnom radu, razviti lični plan rada, i rukovoditi ličnim vremenom efektivno |                                |             |               |             |            |                                                      |       |         |      |       |
| Postaviti prioritete i radne planove za druge                                                              |                                |             |               |             |            |                                                      |       |         |      |       |
| Primeniti tehnike analize odlučivanja da bi postavili prioritete programa i/ili radne jedinice             |                                |             |               |             |            |                                                      |       |         |      |       |
| Napraviti detaljan plan rada službe sa raspodelom zadataka, rasporedom i alokacijom resursa                |                                |             |               |             |            |                                                      |       |         |      |       |
| Uraditi strateški plan                                                                                     |                                |             |               |             |            |                                                      |       |         |      |       |
| Planirati potrebe za kadrovima za period od 3 ili više                                                     |                                |             |               |             |            |                                                      |       |         |      |       |

|                                |  |  |
|--------------------------------|--|--|
| godina                         |  |  |
| Uraditi plan poslovnog slučaja |  |  |

| Zadaci Vašeg radnog mesta                                                                                                                           | Važnost zadatka za uspešan rad |             |               |             |            | Stepen veštine koji posedujete za obavljanje zadatka |       |         |      |       |
|-----------------------------------------------------------------------------------------------------------------------------------------------------|--------------------------------|-------------|---------------|-------------|------------|------------------------------------------------------|-------|---------|------|-------|
|                                                                                                                                                     | Nije Važan                     | Retko važan | Ponekad važan | Često Važan | Vrlo Važan | Nemam Veštinu                                        | Nizak | Srednji | Viši | Visok |
|                                                                                                                                                     | 1                              | 2           | 3             | 4           | 5          | 1                                                    | 2     | 3       | 4    | 5     |
| <b>4. PROCENA PERFORMANSI/ IZVRŠENJA/UČINKA</b>                                                                                                     |                                |             |               |             |            |                                                      |       |         |      |       |
| Procenjivati performanse zaposlenih pod vašom supervizijom, pružiti korisnu povratnu informaciju i obuku                                            |                                |             |               |             |            |                                                      |       |         |      |       |
| Evaluirati i procenjivati performanse programa ili delova programa                                                                                  |                                |             |               |             |            |                                                      |       |         |      |       |
| Evaluirati i procenjivati performanse programa ili delova programa u odnosu na troškove budžeta                                                     |                                |             |               |             |            |                                                      |       |         |      |       |
| <b>5. REŠAVANJE PROBLEMA</b>                                                                                                                        |                                |             |               |             |            |                                                      |       |         |      |       |
| Rešavati probleme ponašanja i rada zaposlenih i tima                                                                                                |                                |             |               |             |            |                                                      |       |         |      |       |
| Identifikovati probleme u toku odvijanja programa ili delova programa, analizirati osnovne uzroke, i dizajnirati odgovor da bi rešili program       |                                |             |               |             |            |                                                      |       |         |      |       |
| Utvrđiti i analizirati faktore u spoljnjem okruženju koji mogu uticati na program i/ili preduzeti mere za njihovu korekciju i prevenirati probleme. |                                |             |               |             |            |                                                      |       |         |      |       |
| <b>6. VOĐENJE</b>                                                                                                                                   |                                |             |               |             |            |                                                      |       |         |      |       |
| Motivisati zaposlene na individualne akcije                                                                                                         |                                |             |               |             |            |                                                      |       |         |      |       |
| Razgovarati o viziji i misiji sa timovima i radnim grupama                                                                                          |                                |             |               |             |            |                                                      |       |         |      |       |

|                                                       |  |  |
|-------------------------------------------------------|--|--|
| Povezati i motivisati radne timove zajedničkom svrhom |  |  |
| <b>7. DRUGO?</b>                                      |  |  |
